# Supplementary material for: Photoinduced electron transfer endows fluorogenicity in tetrazine-based near-infrared labels
Source: Royal Society of Chemistry journal article supplement (doi:10.1039/d3qm01217d), 2024-01-01
Supplement: d3qm01217d1.pdf [file d3qm01217d1.pdf]

## Electronic Supplementary Information

### Photoinduced electron transfer endows fluorogenicity in tetrazine-based near-infrared labels

Tianruo Shen,<sup>a</sup> Xin Li,<sup>b</sup> and Xiaogang Liu<sup>a,\*</sup>

a. Science, Mathematics and Technology Cluster, Singapore University of Technology and Design, 8 Somapah Road, Singapore 487372, Singapore

b. College of Pharmaceutical Science, Zhejiang University, 866 Yuhangtang Road, Hangzhou 310058, China

**Corresponding author:**

Xiaogang Liu: [xiaogang\\_liu@sutd.edu.sg](mailto:xiaogang_liu@sutd.edu.sg)

## Contents

|                                                                                                             |     |
|-------------------------------------------------------------------------------------------------------------|-----|
| 1. Experimental conditions for the reported tetrazine-based labels with/toward near-infrared emissions..... | S2  |
| 2. Computational methods and additional results.....                                                        | S3  |
| 3. References .....                                                                                         | S24 |

# 1. Experimental conditions for the reported tetrazine-based labels with/toward near-infrared emissions

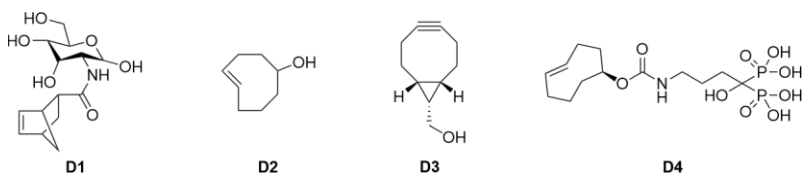

Fig. S1 Molecular structures of different dienophiles.

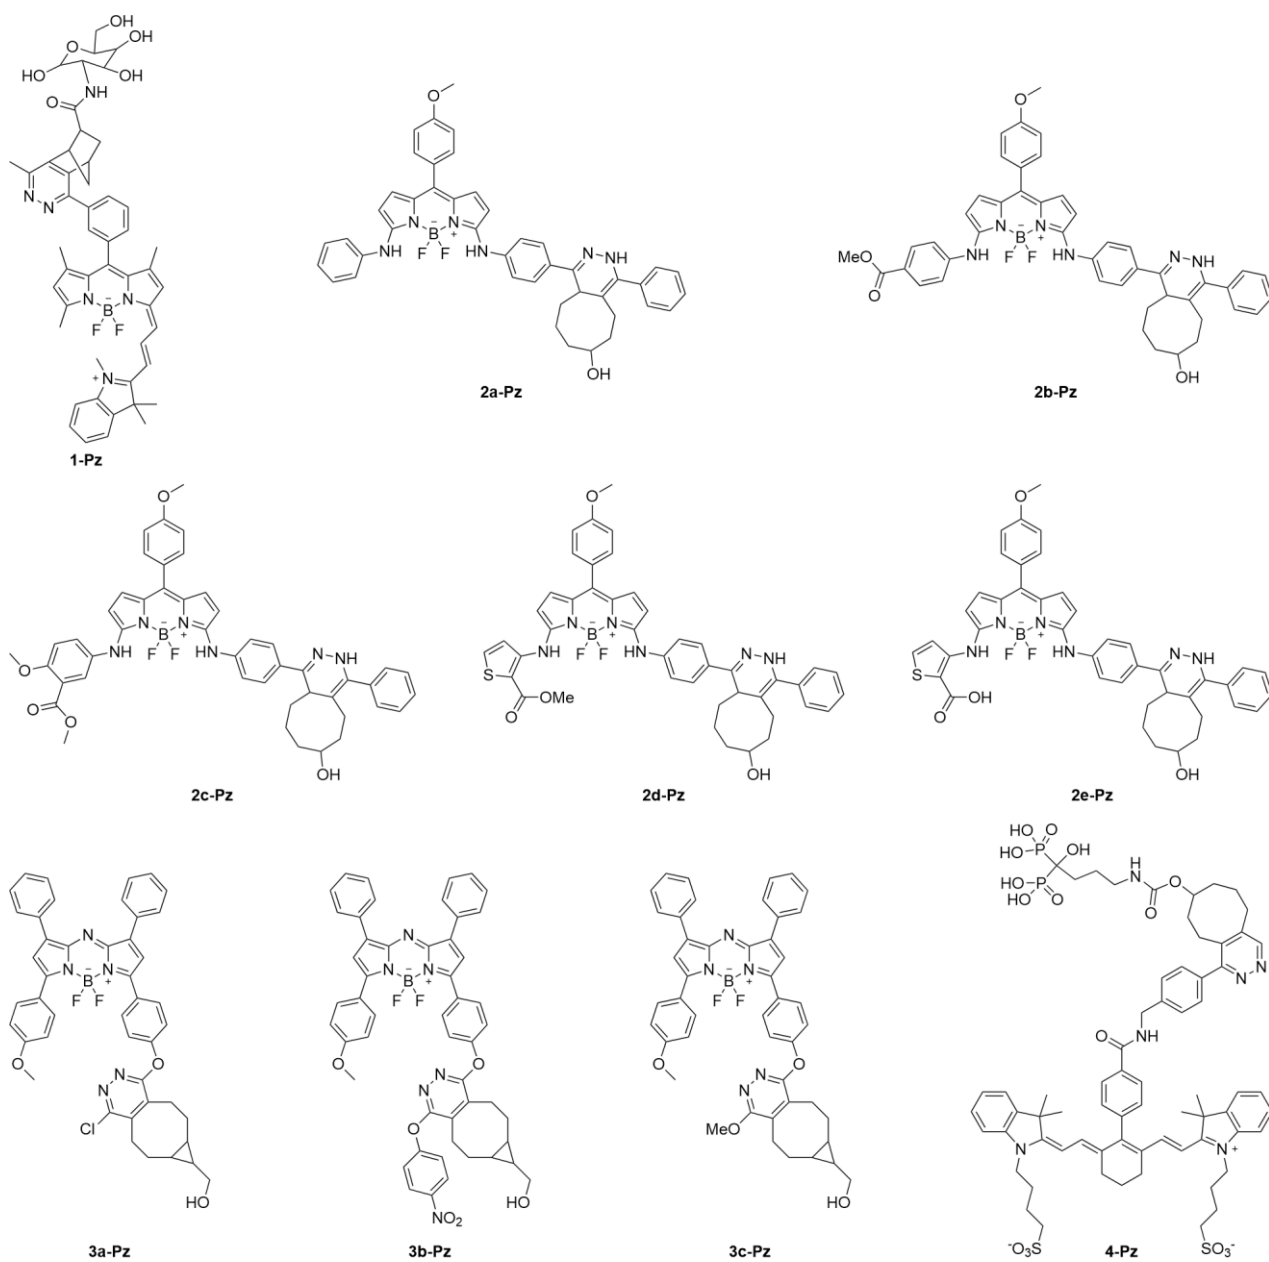

Fig. S2 Molecular structures of post-reacted labels upon inverse electron-demand Diels-Alder (IEDDA) reactions.

**Table S1** Experimental conditions for four sets of labels.

| Set | Reacted with | Medium             | Reference                          |
|-----|--------------|--------------------|------------------------------------|
| 1   | D1           | DMF/PBS = 1:1, v/v | Xu <i>et al.</i> <sup>1</sup>      |
| 2   | D2           | DMF/PBS = 1:1, v/v | Yang <i>et al.</i> <sup>2</sup>    |
| 3   | D3           | CHCl <sub>3</sub>  | Wu and O'Shea <sup>3</sup>         |
| 4   | D4           | <i>In vivo</i>     | Sadeghi <i>et al.</i> <sup>4</sup> |

**Table S2** Photophysical properties of different post-reacted labels.

| Molecule     | Maximum molar extinction coefficient ( $\epsilon_{\max}$ ; $\text{cm}^{-1} \times \text{M}^{-1}$ ) | Quantum yield ( $\phi$ ) | Reference                          |
|--------------|----------------------------------------------------------------------------------------------------|--------------------------|------------------------------------|
| <b>3a-Pz</b> | 92,000                                                                                             | 0.33                     | Wu and O'Shea <sup>3</sup>         |
| <b>3b-Pz</b> | 90,000                                                                                             | 0.34                     |                                    |
| <b>3c-Pz</b> | 91,000                                                                                             | 0.34                     |                                    |
| <b>4-Pz</b>  | 150,133                                                                                            | 0.014                    | Sadeghi <i>et al.</i> <sup>4</sup> |

## 2. Computational methods and additional results

The density functional theory (DFT) and time-dependent DFT (TD-DFT) calculations were performed in the Gaussian 16.<sup>5-7</sup> All the calculations were performed using BHandHLYP functional and 6-31G\*\* basis set.<sup>8-10</sup> Solvation effects were considered by deploying the Solvation Model Based on the Density (SMD) solvent model and corrected linear-response (cLR) solvent formalism.<sup>11,12</sup> All the optimized molecular structures at the ground and excited states were validated at the local minimums (with positive frequencies) of the potential energy surfaces. The analyses of hole-electron distributions and frontier orbitals were conducted and visualized using Multiwfn and VMD.<sup>13,14</sup>

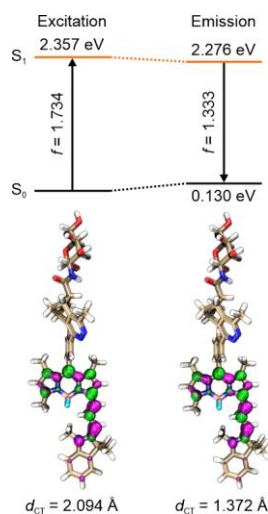

**Fig. S3** Energy levels and oscillator strength ( $f$ ) of key states with corresponding hole-electron distributions and charge transfer distance ( $d_{CT}$ ) of **1-Pz** during the excitation and emission processes in DMSO. Electron: highlighted in green; Hole: highlighted in pink.

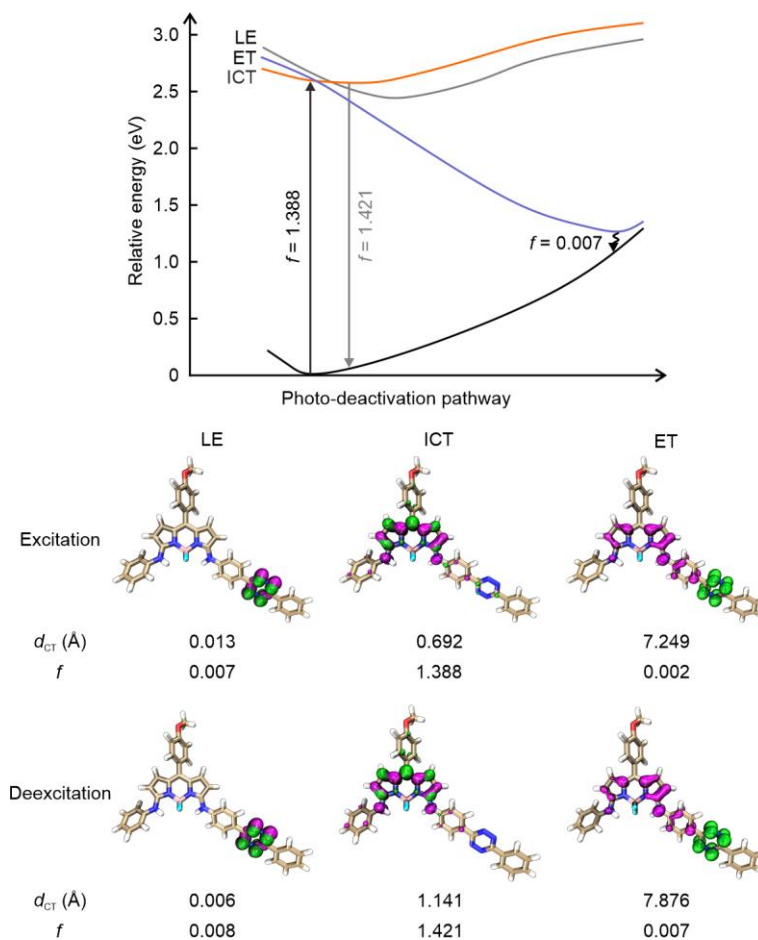

**Fig. S4** Energy levels of key states with corresponding hole-electron distributions,  $d_{CT}$ , and  $f$  of **2a** during the excitation and deexcitation processes in DMSO. LE: locally excited; ICT: intramolecular charge transfer; ET: electron transfer; Electron: highlighted in green; Hole: highlighted in pink.

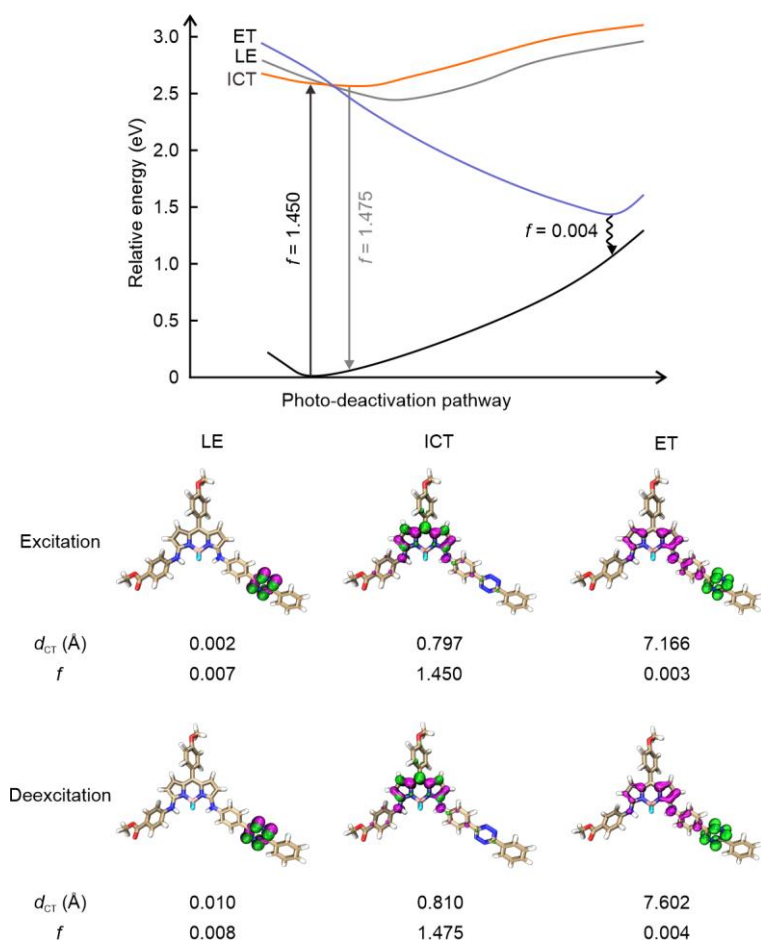

**Fig. S5** Energy levels of key states with corresponding hole-electron distributions,  $d_{CT}$ , and  $f$  of **2b** during the excitation and deexcitation processes in DMSO. LE: locally excited; ICT: intramolecular charge transfer; ET: electron transfer; Electron: highlighted in green; Hole: highlighted in pink.

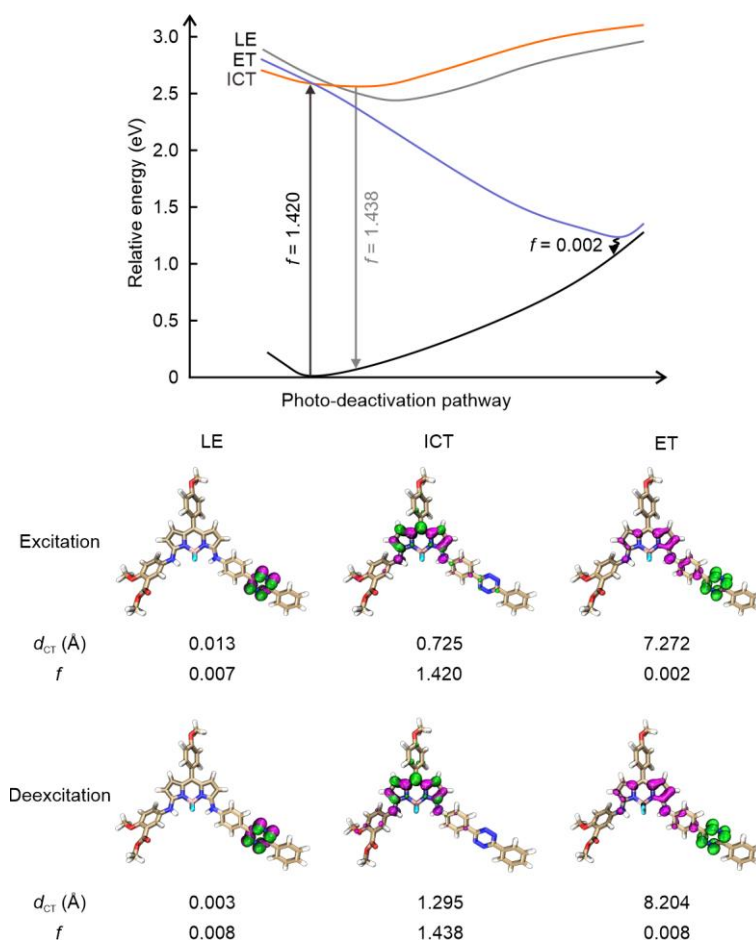

**Fig. S6** Energy levels of key states with corresponding hole-electron distributions,  $d_{CT}$ , and  $f$  of **2c** during the excitation and deexcitation processes in DMSO. LE: locally excited; ICT: intramolecular charge transfer; ET: electron transfer; Electron: highlighted in green; Hole: highlighted in pink.

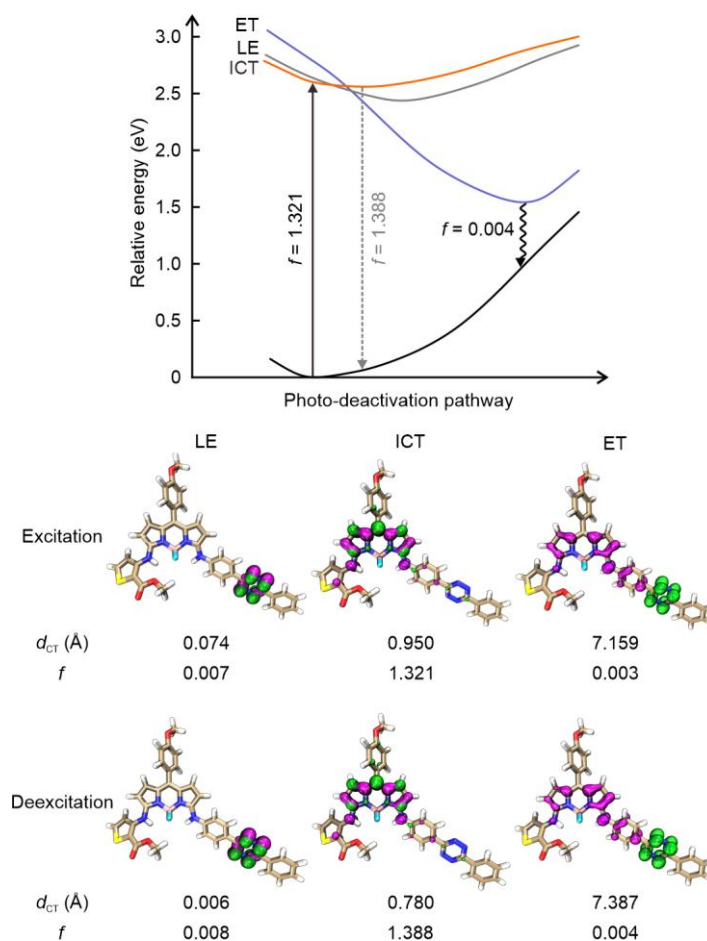

**Fig. S7** Energy levels of key states with corresponding hole-electron distributions,  $d_{CT}$ , and  $f$  of **2e** during the excitation and deexcitation processes in DMSO. LE: locally excited; ICT: intramolecular charge transfer; ET: electron transfer; Electron: highlighted in green; Hole: highlighted in pink.



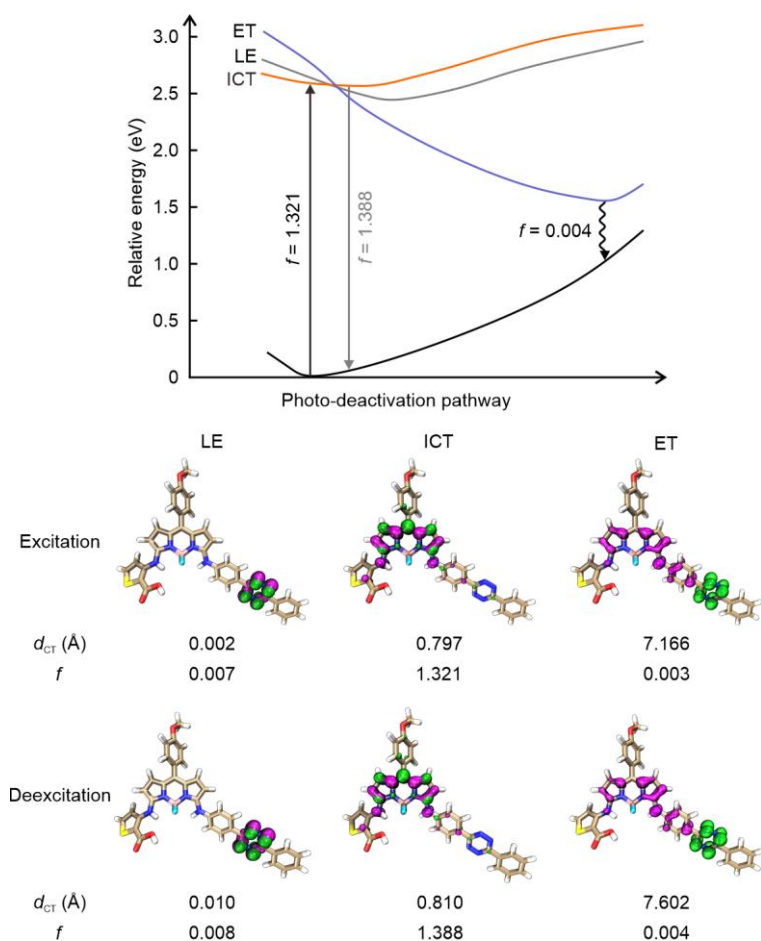

**Fig. S8** Energy levels of key states with corresponding hole-electron distributions,  $d_{CT}$ , and  $f$  of **2e** during the excitation and deexcitation processes in DMSO. LE: locally excited; ICT: intramolecular charge transfer; ET: electron transfer; Electron: highlighted in green; Hole: highlighted in pink.

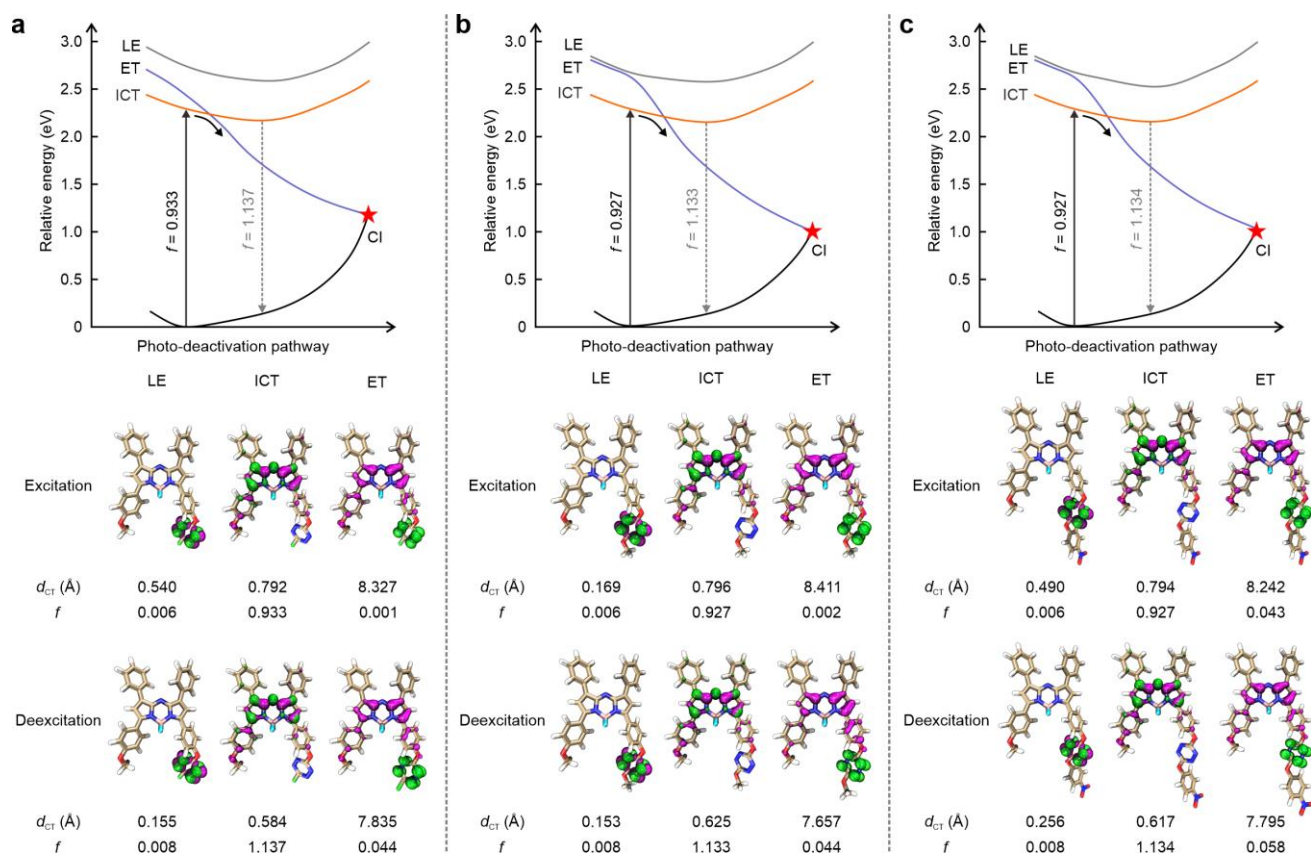

**Fig. S9** Energy levels of key states with corresponding hole-electron distributions,  $d_{CT}$ , and  $f$  of (a) **3a**, (b) **3b**, and (c) **3c** during the excitation and deexcitation processes in water. LE: locally excited; ICT: intramolecular charge transfer; ET: electron transfer; Electron: highlighted in green; Hole: highlighted in pink.

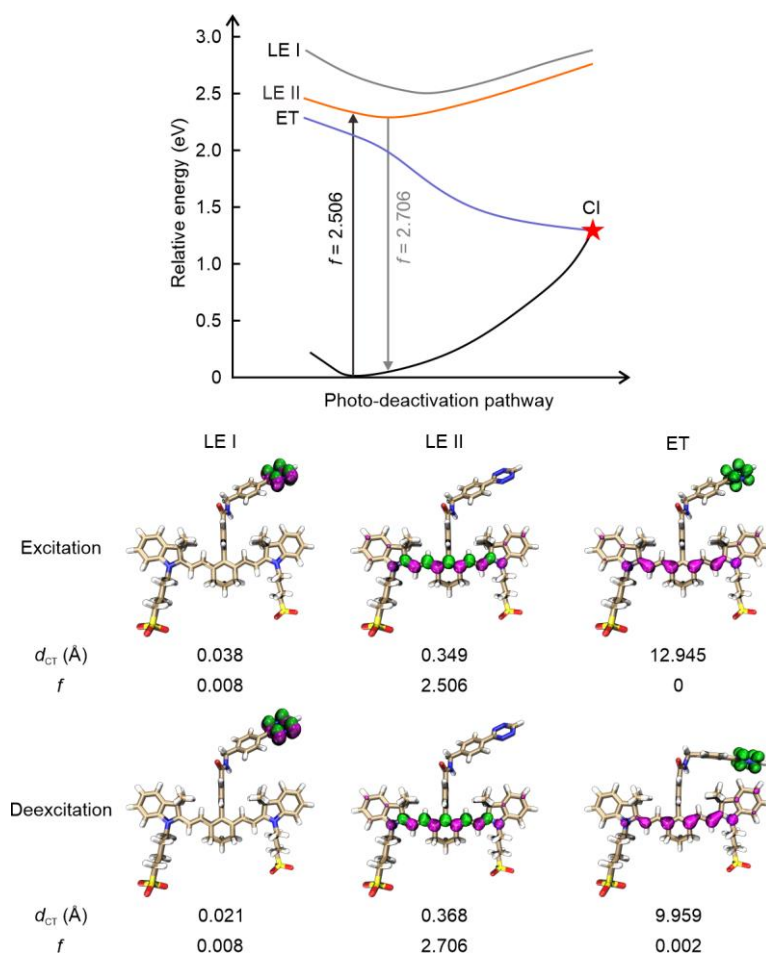

**Fig. S10** Energy levels of key states with corresponding hole-electron distributions,  $d_{CT}$ , and  $f$  of **4** during the excitation and deexcitation processes in DMSO. LE: locally excited; ET: electron transfer; Electron: highlighted in green; Hole: highlighted in pink.

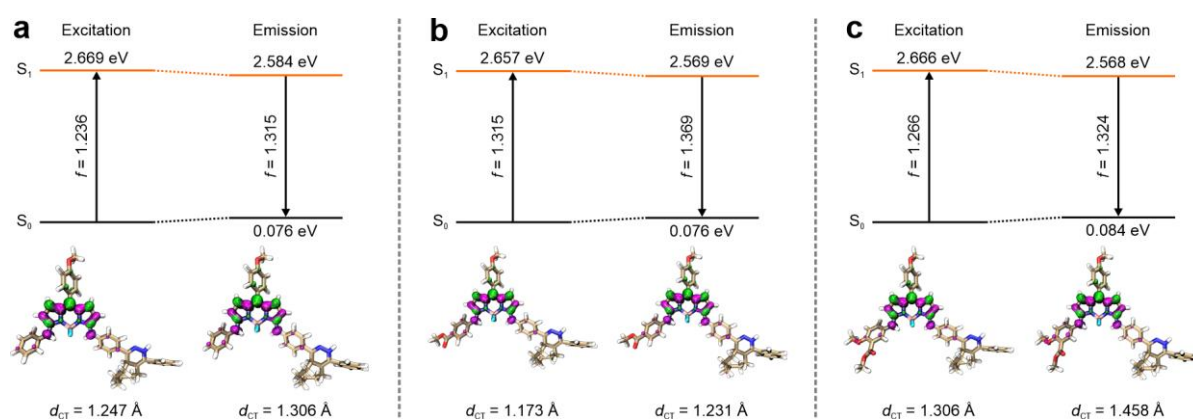

**Fig. S11** Energy levels and  $f$  of key states with corresponding hole-electron distributions and  $d_{CT}$  of (a) **2a-Pz**, (b) **2b-Pz**, and (c) **2c-Pz** during the excitation and emission processes in DMSO. Electron: highlighted in green; Hole: highlighted in pink.

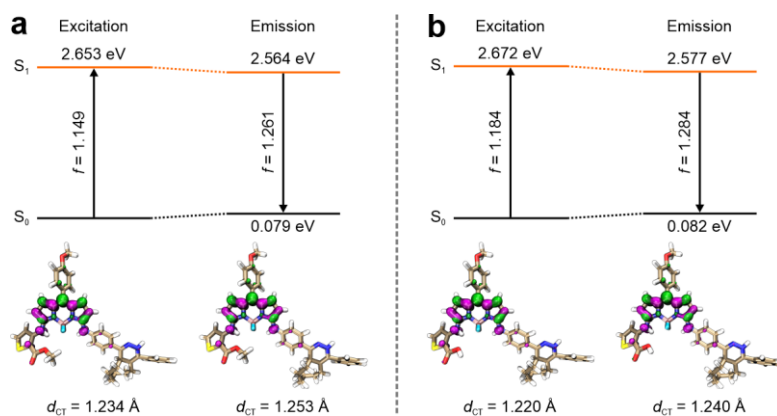

**Fig. S12** Energy levels and  $f$  of key states with corresponding hole-electron distributions and  $d_{CT}$  of (a) **2d-Pz** and (b) **2e-Pz-Pz** during the excitation and emission processes in DMSO. Electron: highlighted in green; Hole: highlighted in pink.

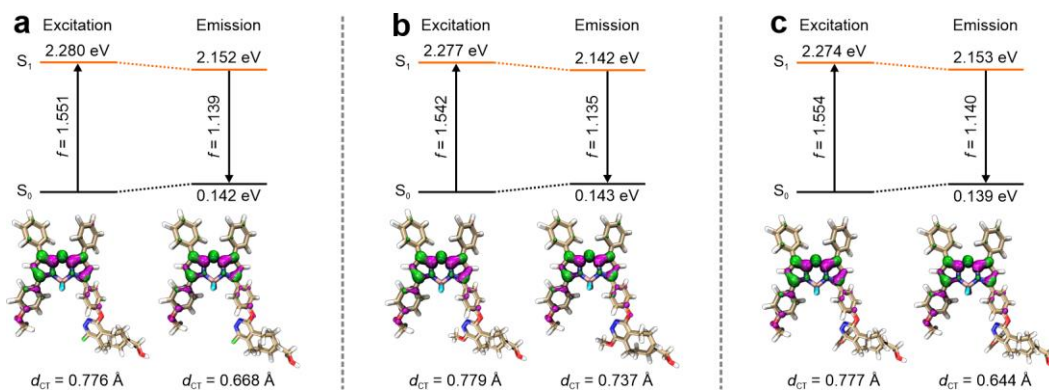

**Fig. S13** Energy levels and  $f$  of key states with corresponding hole-electron distributions and  $d_{CT}$  of (a) **3a-Pz**, (b) **3b-Pz**, and (c) **3c-Pz** during the excitation and emission processes in water. Electron: highlighted in green; Hole: highlighted in pink.

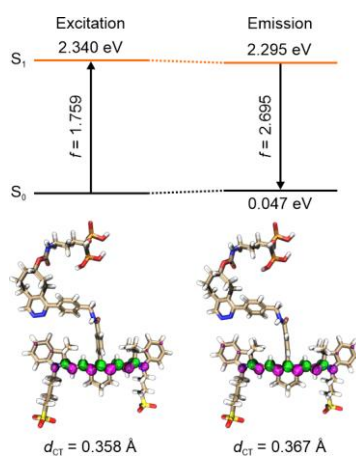

**Fig. S14** Energy levels and  $f$  of key states with corresponding hole-electron distributions and  $d_{CT}$  of **4-Pz** during the excitation and emission processes in DMSO. Electron: highlighted in green; Hole: highlighted in pink.

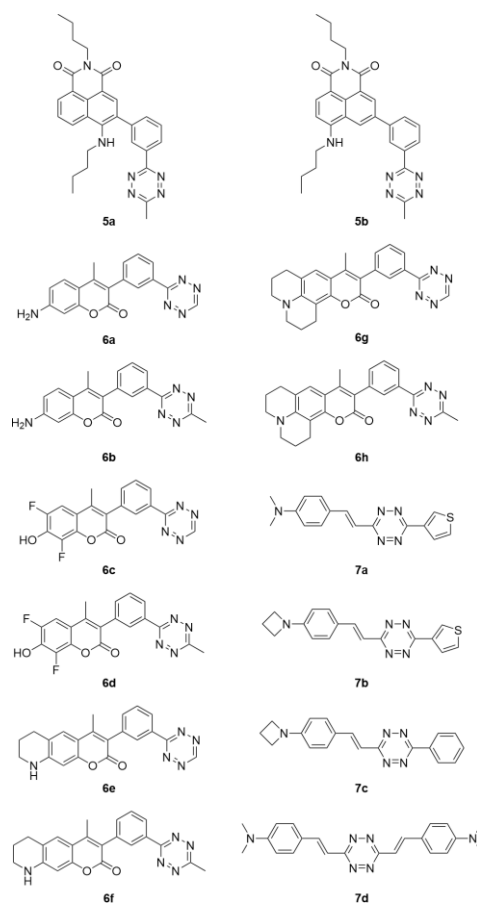

**Fig. S15** Molecular structures of 14 tetrazine-based/merged fluorogenic labels with the fluorescence emissions in the visible region.

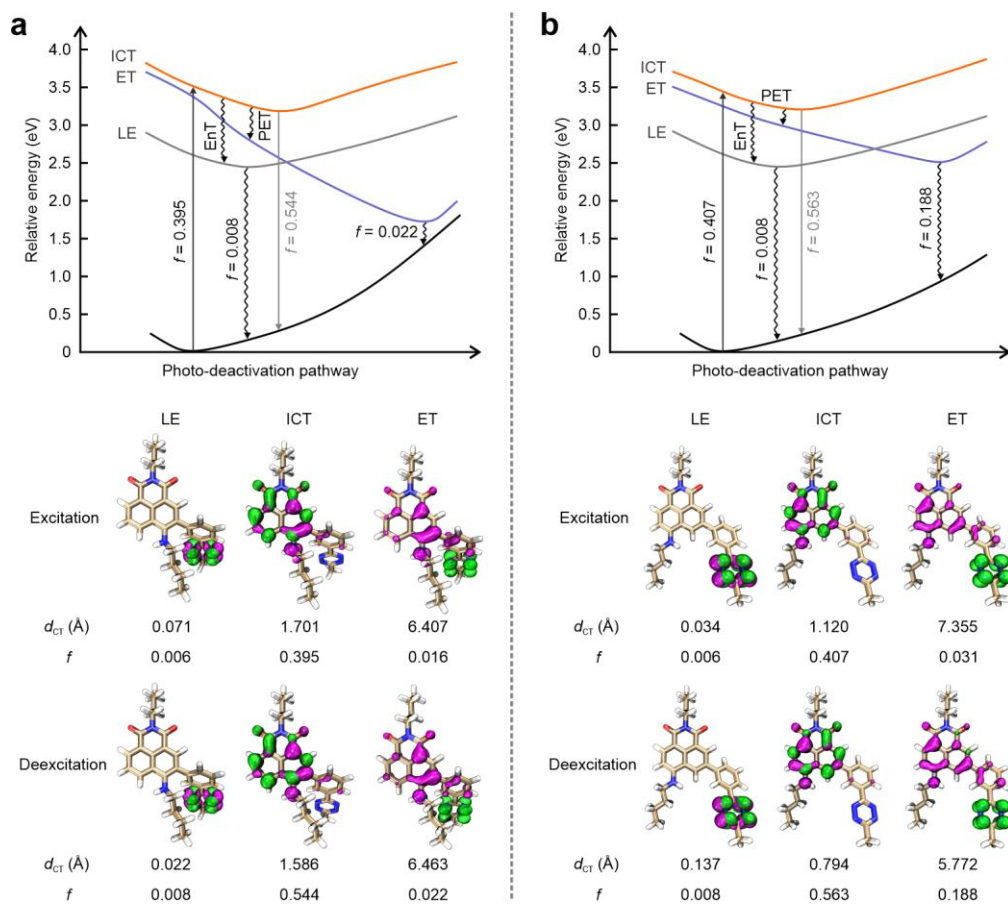

**Fig. S16** Energy levels of key states with corresponding hole-electron distributions,  $d_{CT}$ , and  $f$  of (a) **5a** and (b) **5b** during the excitation and deexcitation processes in water. LE: locally excited; ICT: intramolecular charge transfer; ET: electron transfer; Electron: highlighted in green; Hole: highlighted in pink.

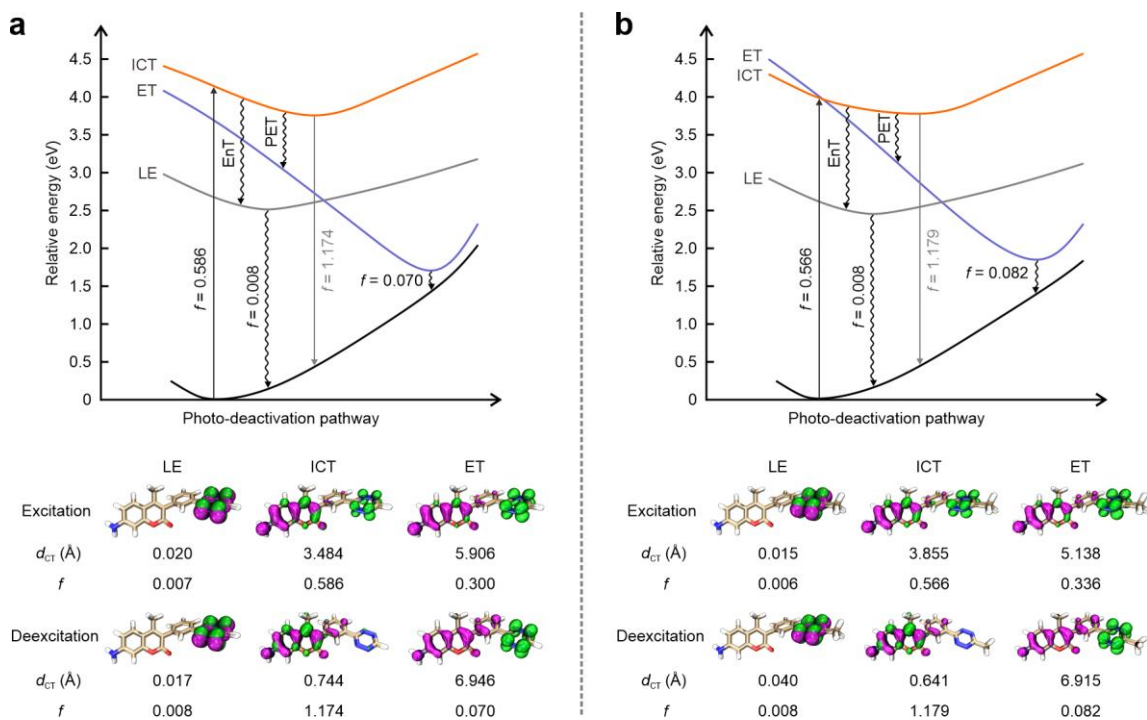

**Fig. S17** Energy levels of key states with corresponding hole-electron distributions,  $d_{CT}$ , and  $f$  of (a) **6a** and (b) **6b** during the excitation and deexcitation processes in water. LE: locally excited; ICT: intramolecular charge transfer; ET: electron transfer; Electron: highlighted in green; Hole: highlighted in pink.

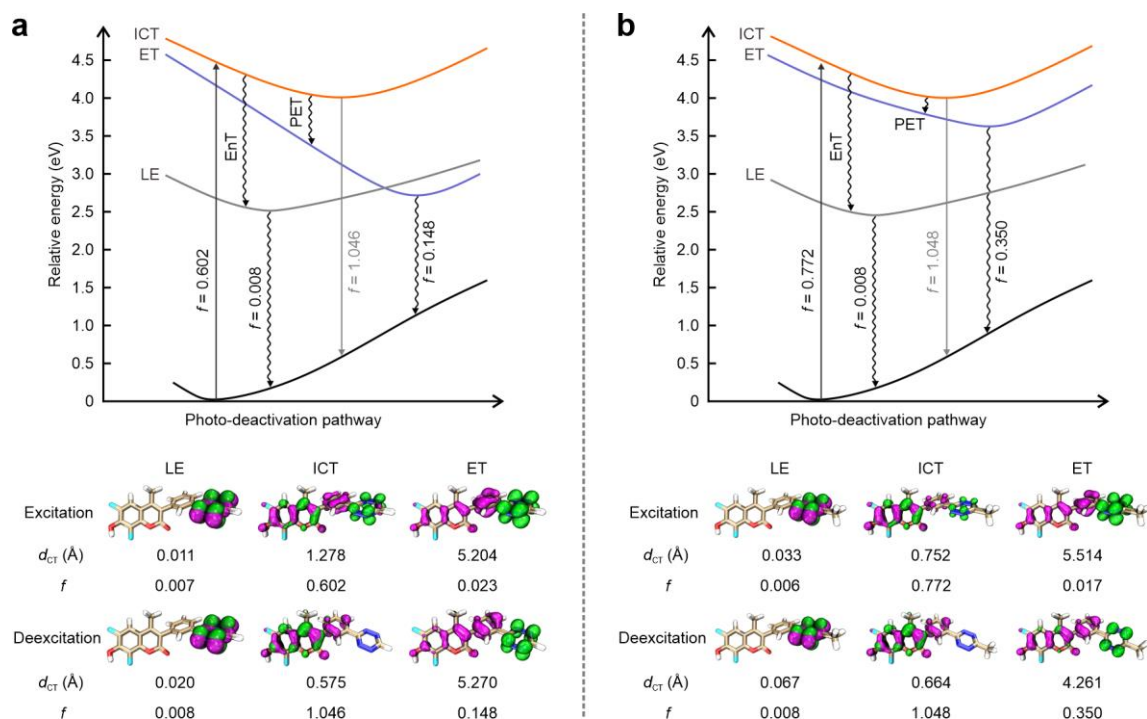

**Fig. S18** Energy levels of key states with corresponding hole-electron distributions,  $d_{CT}$ , and  $f$  of (a) **6c** and (b) **6d** during the excitation and deexcitation processes in water. LE: locally excited; ICT: intramolecular charge transfer; ET: electron transfer; Electron: highlighted in green; Hole: highlighted in pink.

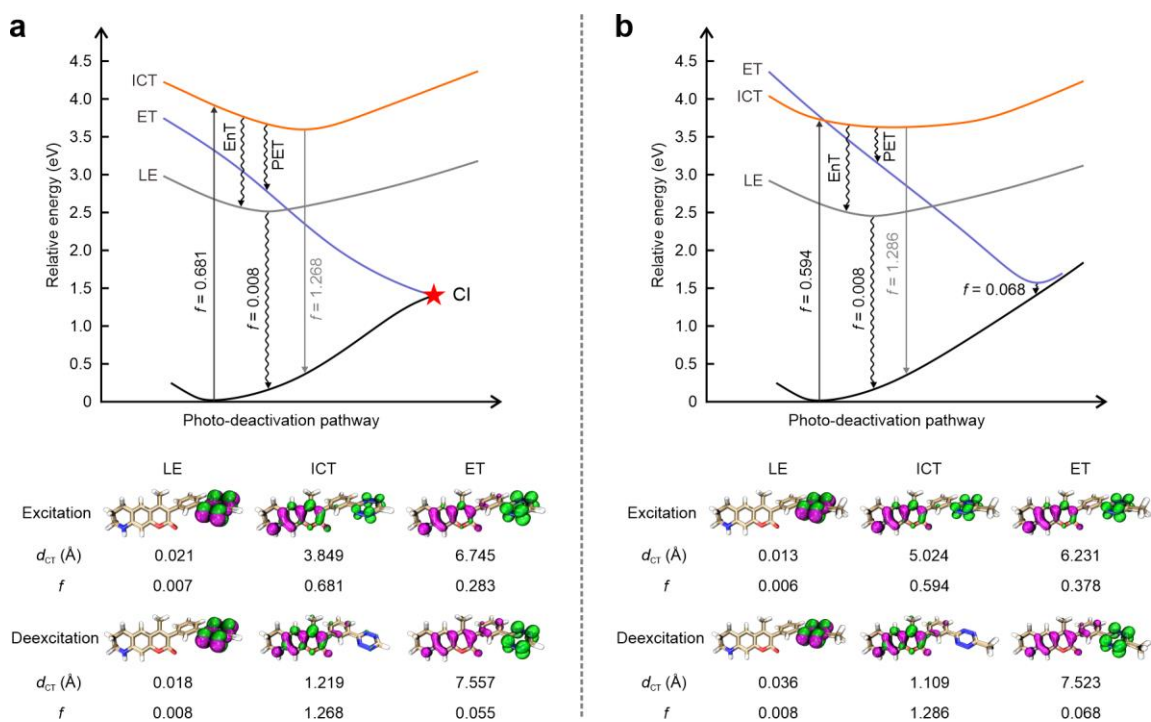

**Fig. S19** Energy levels of key states with corresponding hole-electron distributions,  $d_{CT}$ , and  $f$  of (a) **6e** and (b) **6f** during the excitation and deexcitation processes in water. LE: locally excited; ICT: intramolecular charge transfer; ET: electron transfer; Electron: highlighted in green; Hole: highlighted in pink.

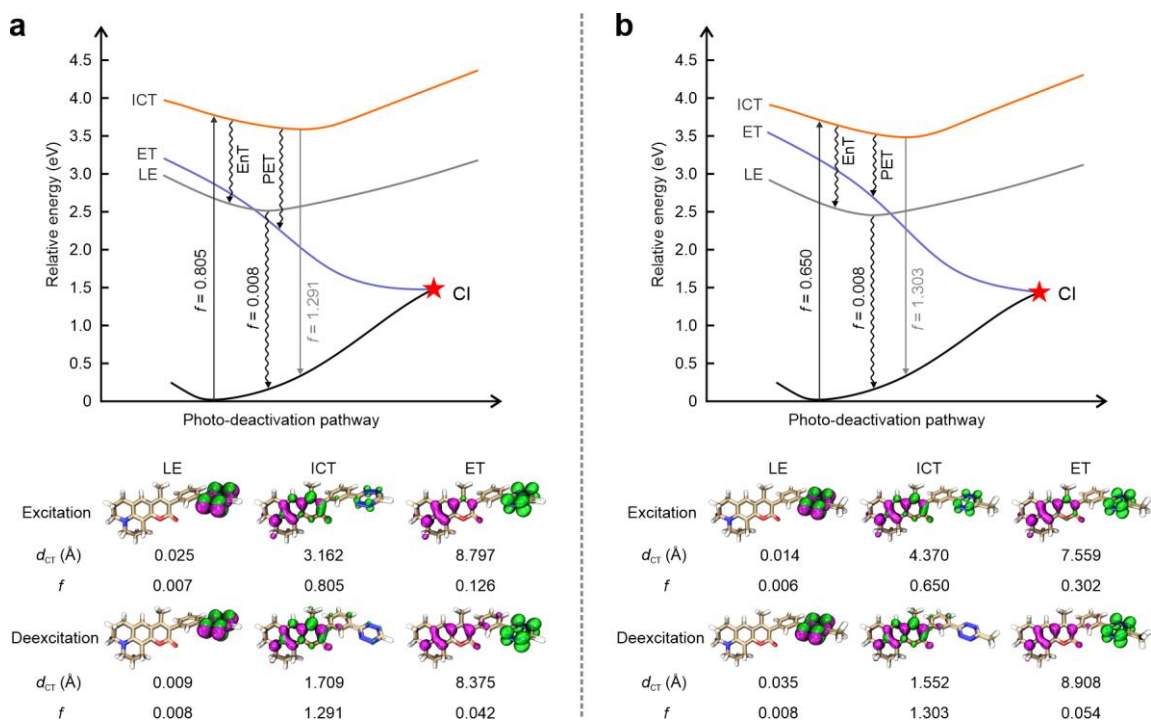

**Fig. S20** Energy levels of key states with corresponding hole-electron distributions,  $d_{CT}$ , and  $f$  of (a) **6g** and (b) **6h** during the excitation and deexcitation processes in water. LE: locally excited; ICT: intramolecular charge transfer; ET: electron transfer; Electron: highlighted in green; Hole: highlighted in pink.



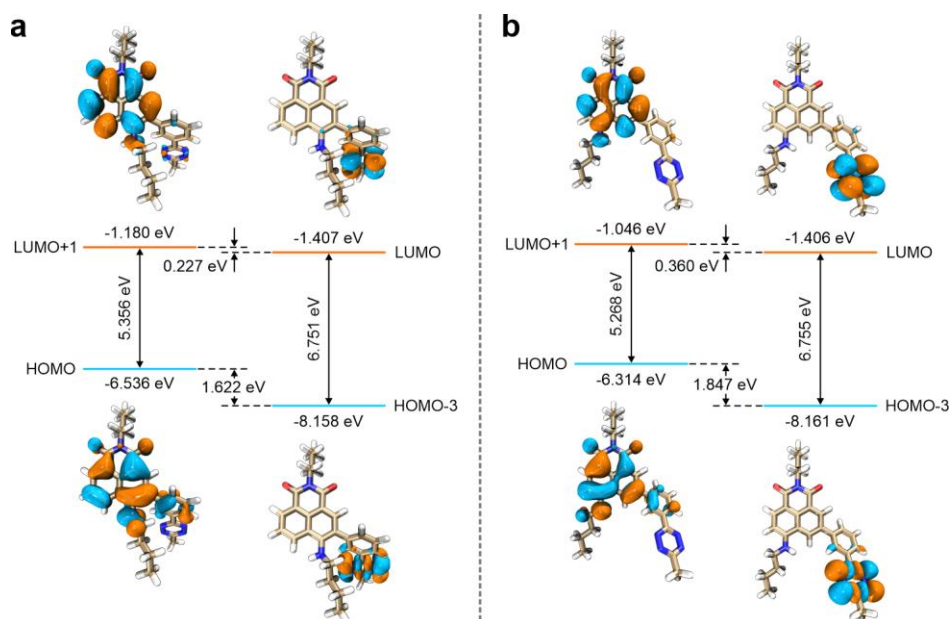

**Fig. S21** Calculated electronic energies of different frontier orbitals of (a) **5a** and (b) **5b** during the vertical excitation in water.

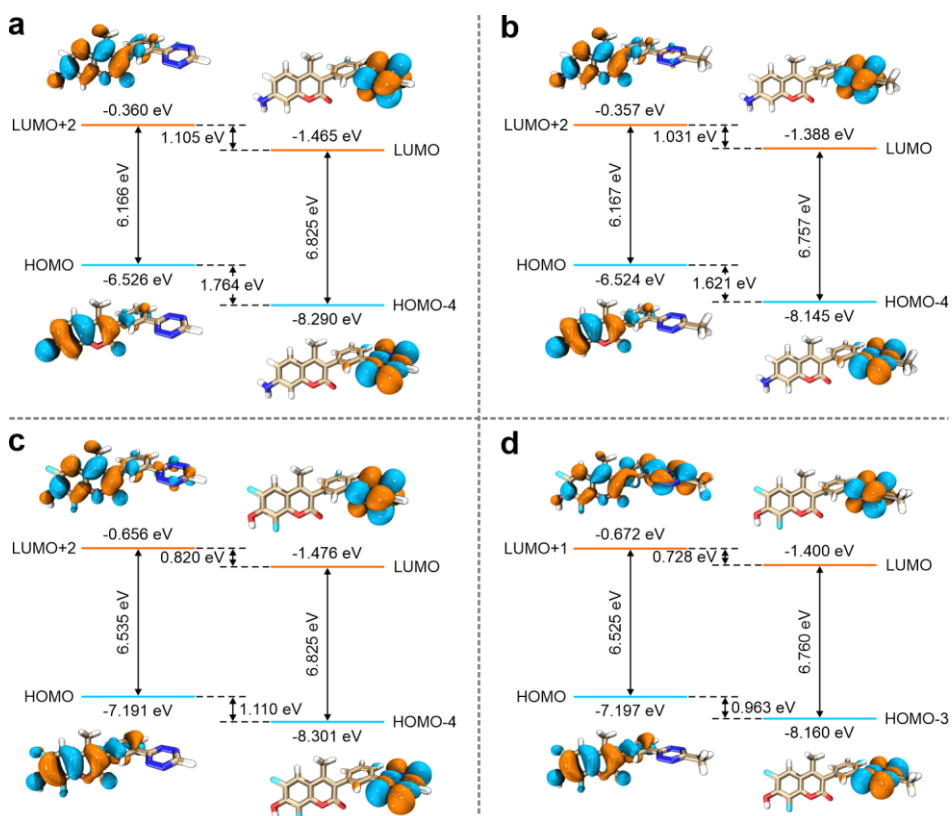

**Fig. S22** Calculated electronic energies of different frontier orbitals of (a) **6a**, (b) **6b**, (c) **6c**, and (d) **6d** during the vertical excitation in water.

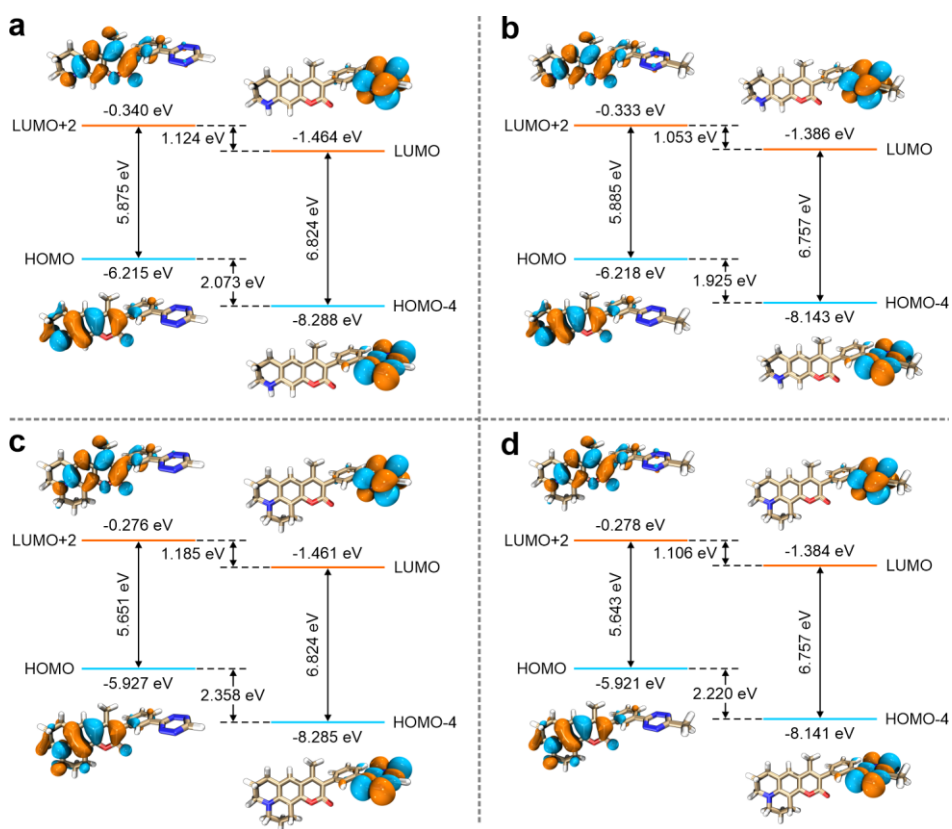

**Fig. S23** Calculated electronic energies of different frontier orbitals of (a) **6e**, (b) **6f**, (c) **6g**, and (d) **6h** during the vertical excitation in water.

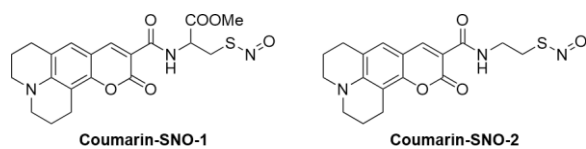

**Fig. S24** Molecular structures of **Coumarin-SNO-1** (left) and **Coumarin-SNO-2** (right).

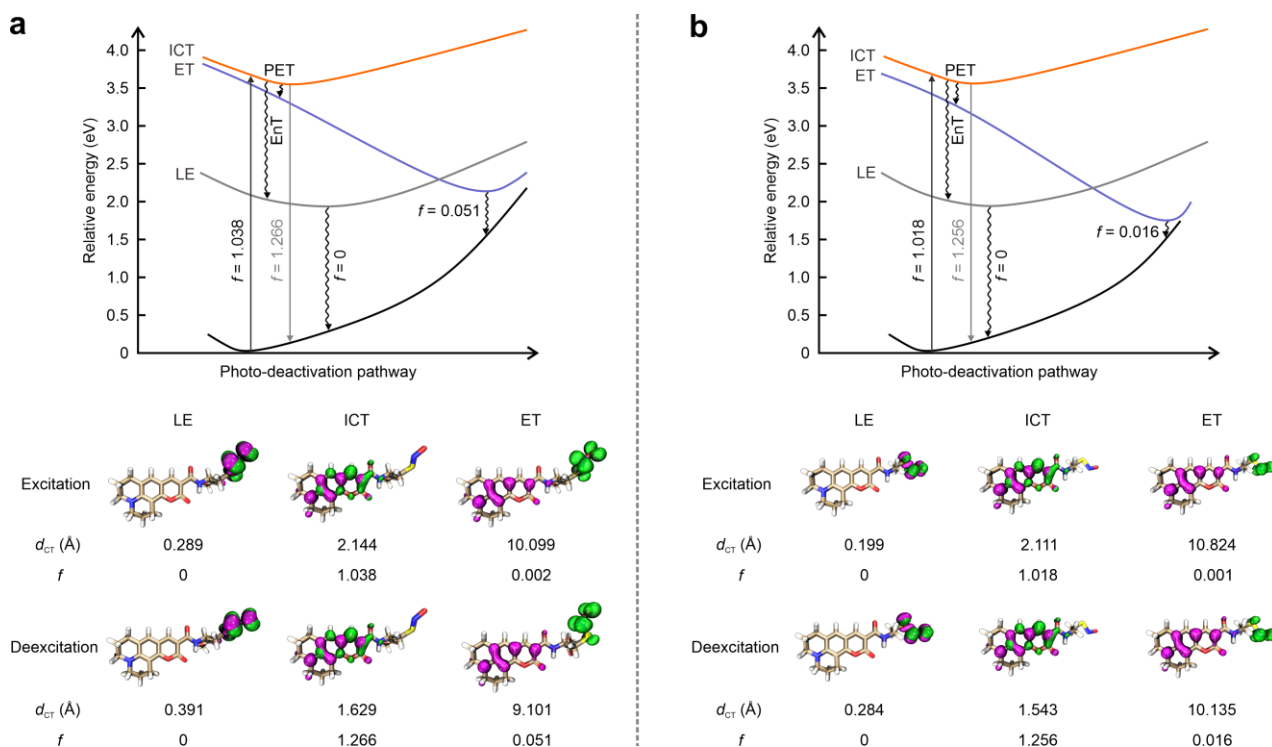

**Fig. S25** Energy levels of key states with corresponding hole-electron distributions,  $d_{CT}$ , and  $f$  of (a) **Coumarin-SNO-1** and (b) **Coumarin-SNO-2** during the excitation and deexcitation processes in DMSO. LE: locally excited; ICT: intramolecular charge transfer; ET: electron transfer; Electron: highlighted in green; Hole: highlighted in pink.

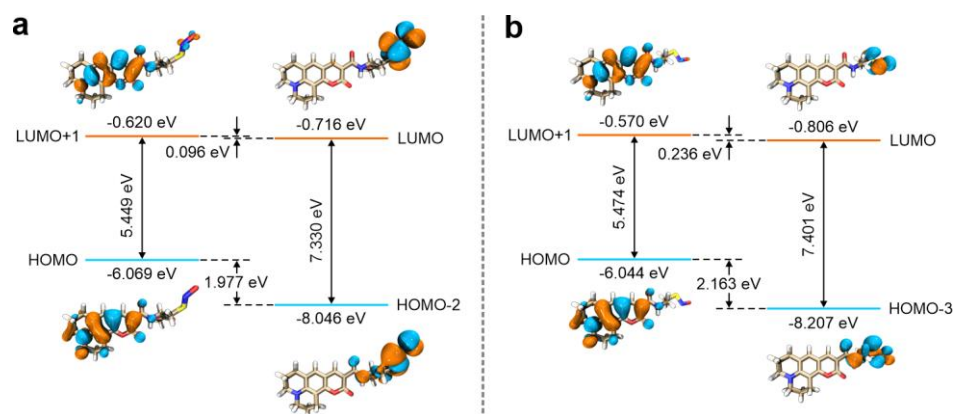

**Fig. S26** Calculated electronic energies of different frontier orbitals of (a) **Coumarin-SNO-1** and (b) **Coumarin-SNO-2** during the vertical excitation in DMSO.

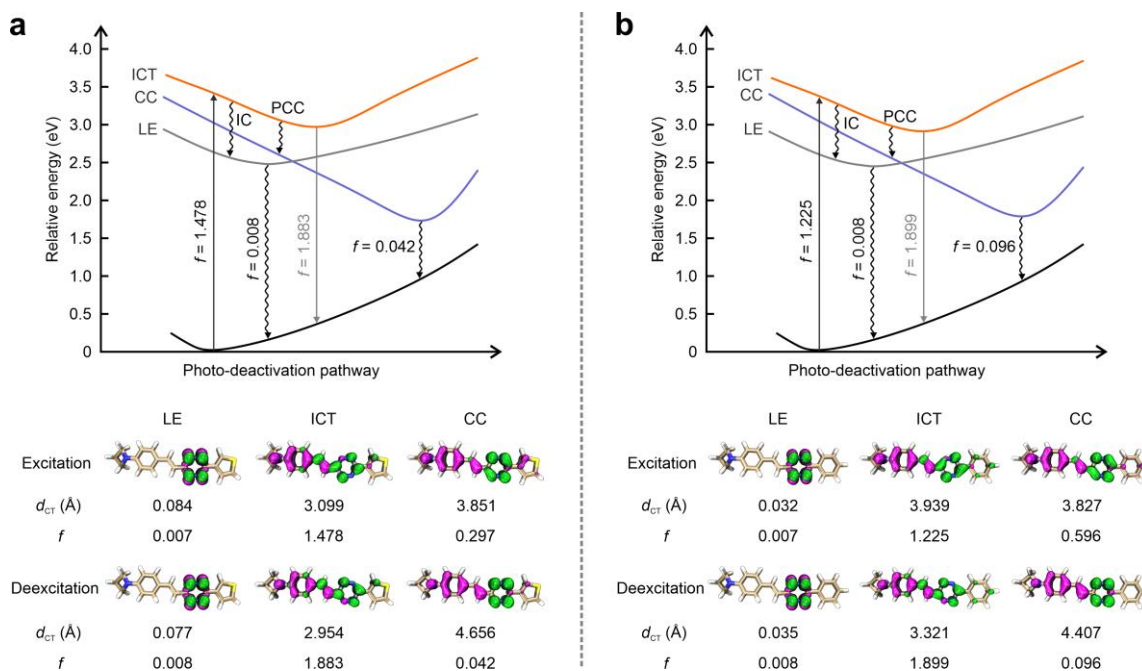

**Fig. S27** Energy levels of key states with corresponding hole-electron distributions,  $d_{CT}$ , and  $f$  of (a) **7b** and (b) **7c** during the excitation and deexcitation processes in water. LE: locally excited; ICT: intramolecular charge transfer; CC: charge centralization; Electron: highlighted in green; Hole: highlighted in pink.

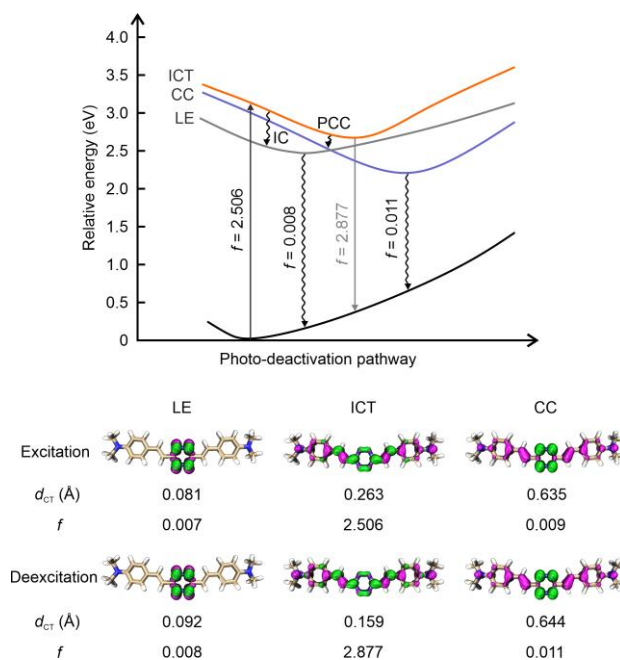

**Fig. S28** Energy levels of key states with corresponding hole-electron distributions,  $d_{CT}$ , and  $f$  of **7d** during the excitation and deexcitation processes in water. LE: locally excited; ICT: intramolecular charge transfer; CC: charge centralization; Electron: highlighted in green; Hole: highlighted in pink.

**Table S3** Fragment contributions ( $\eta_F$ , %) induced by tetrazine to the CC states in **7a-d**.

| Molecule  | Process      | Hole  | Electron | Overlap |
|-----------|--------------|-------|----------|---------|
| <b>7a</b> | Excitation   | 10.11 | 54.04    | 23.38   |
|           | Deexcitation | 10.38 | 98.36    | 31.95   |
| <b>7b</b> | Excitation   | 10.40 | 54.44    | 23.79   |
|           | Deexcitation | 10.32 | 98.43    | 31.87   |
| <b>7c</b> | Excitation   | 11.31 | 66.20    | 27.36   |
|           | Deexcitation | 12.64 | 97.29    | 35.07   |
| <b>7d</b> | Excitation   | 14.83 | 98.87    | 38.29   |
|           | Deexcitation | 13.06 | 98.99    | 35.96   |

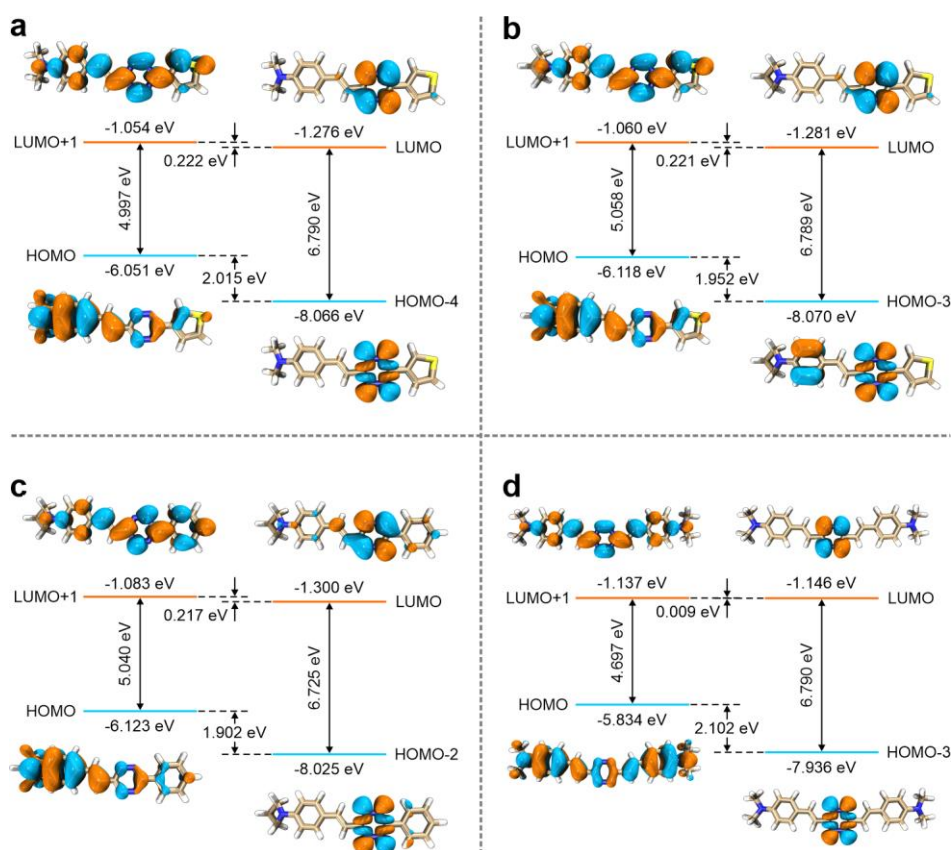

**Fig. S29** Calculated electronic energies of different frontier orbitals of (a) **7a**, (b) **7b**, (c) **7c**, and (d) **7d** during the vertical excitation in water.

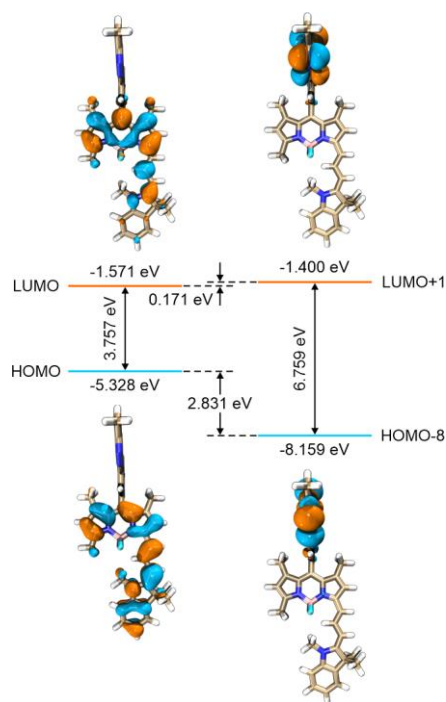

**Fig. S30** Calculated electronic energies of different frontier orbitals of **1** during the vertical excitation in DMSO.

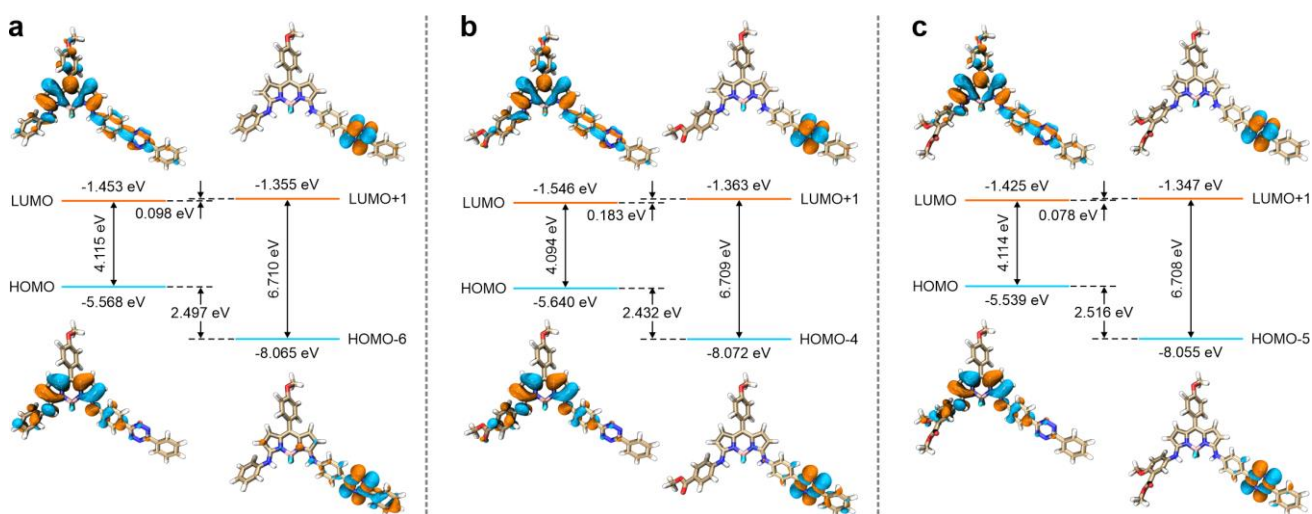

**Fig. S31** Calculated electronic energies of different frontier orbitals of (a) **2a**, (b) **2b**, and (c) **2c** during the vertical excitation in DMSO.

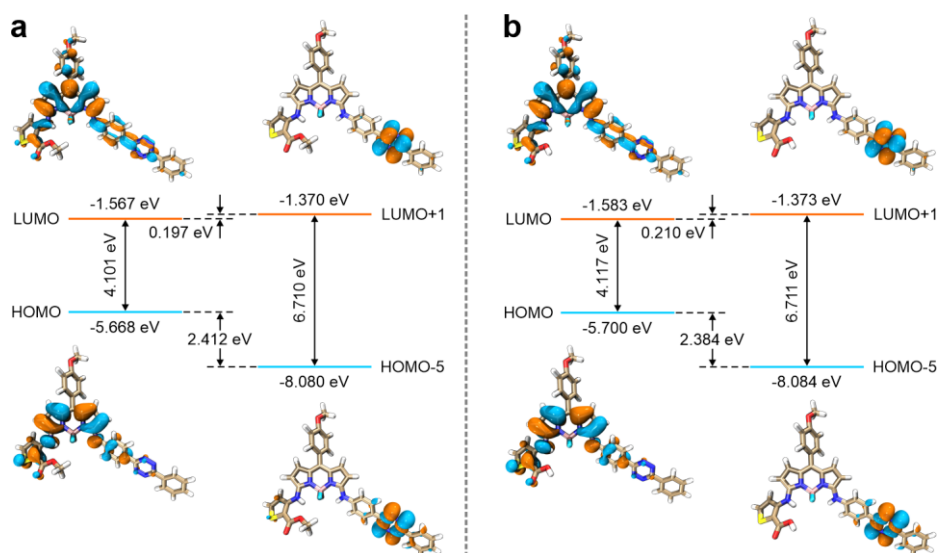

**Fig. S32** Calculated electronic energies of different frontier orbitals of (a) **2d** and (b) **2e** during the vertical excitation in DMSO.

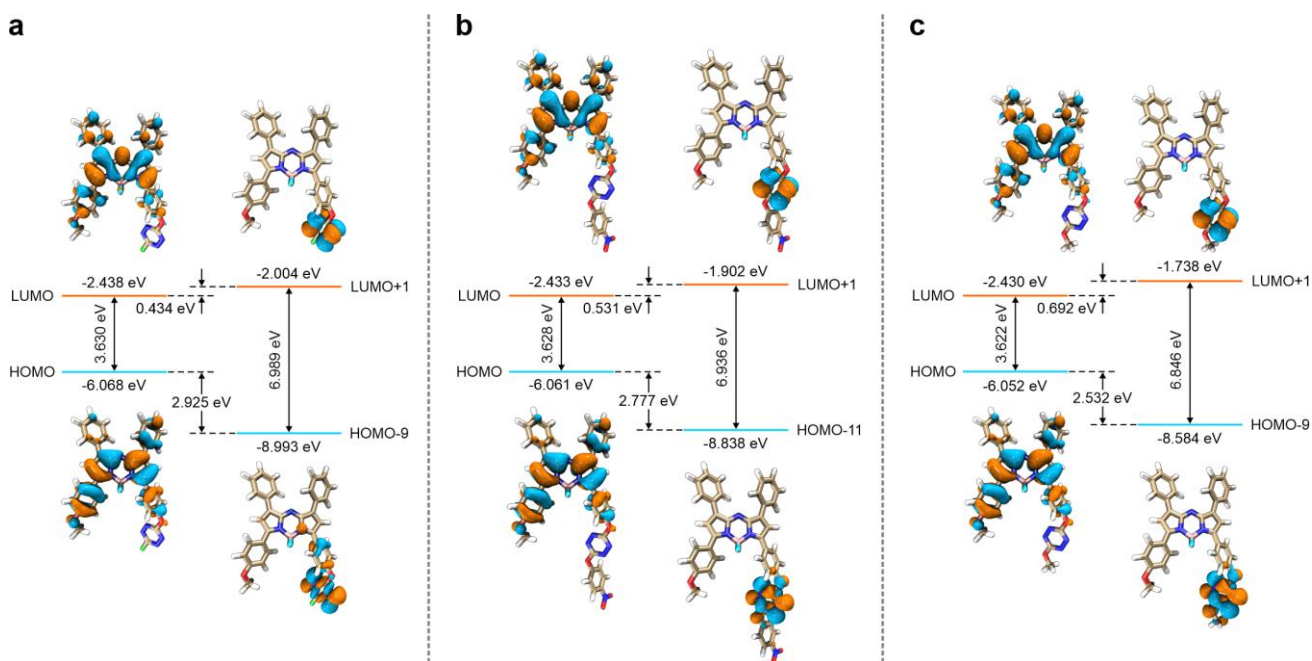

**Fig. S33** Calculated electronic energies of different frontier orbitals of (a) **3a**, (b) **3b**, and (c) **3c** during the vertical excitation in water.

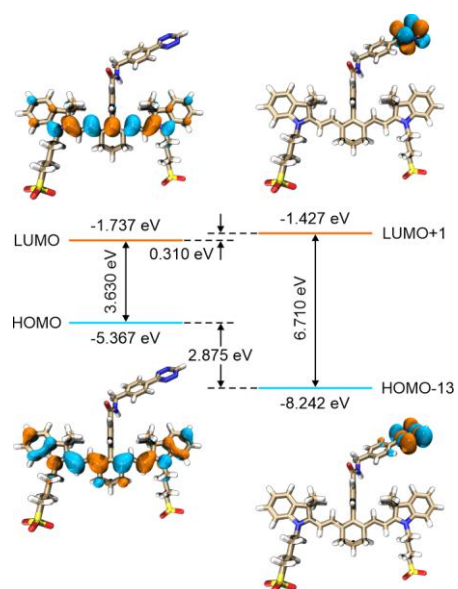

**Fig. S34** Calculated electronic energies of different frontier orbitals of **4** during the vertical excitation in DMSO.



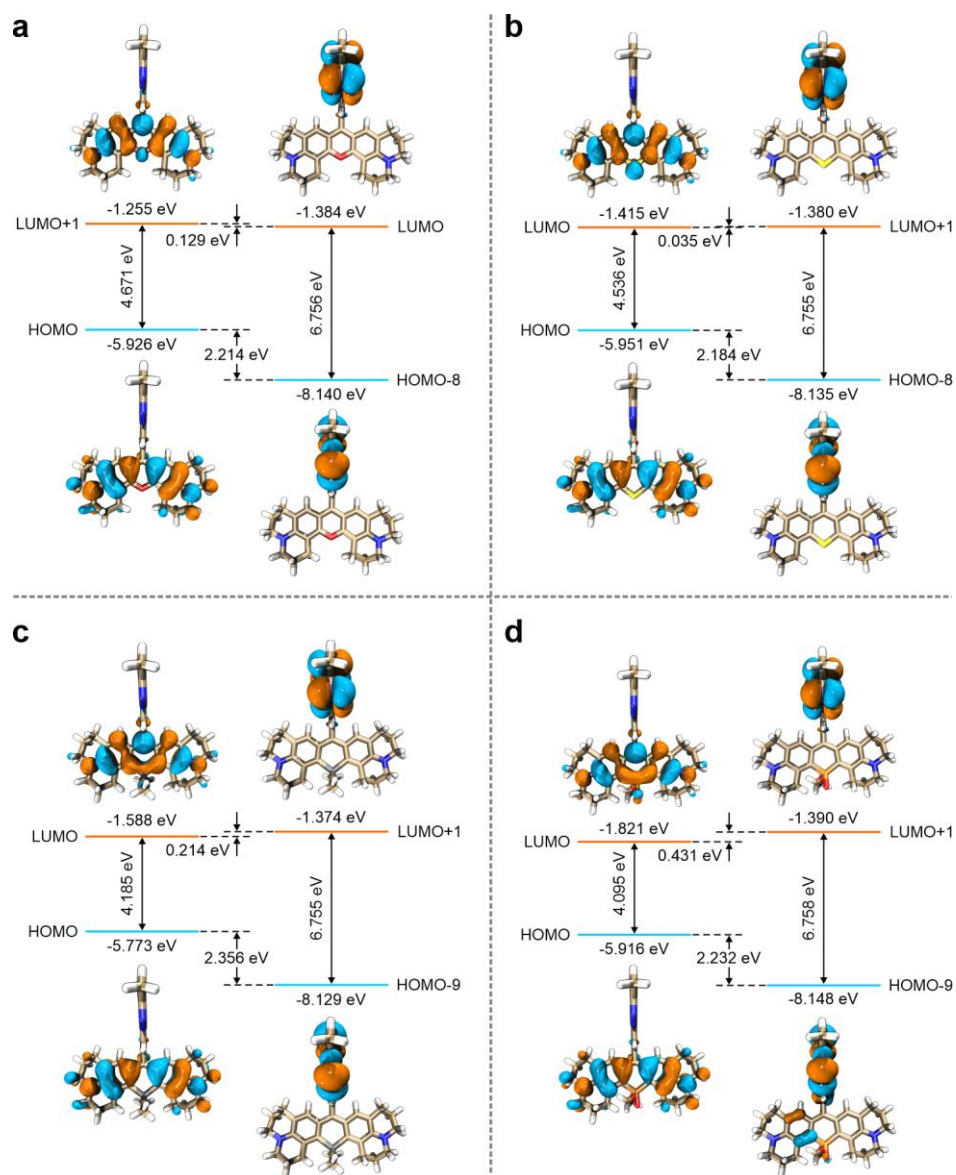

**Fig. S35** Calculated electronic energies of different frontier orbitals of (a) **8a**, (b) **8b**, (c) **8c**, and (d) **8d** during the vertical excitation in DMSO.

### 3. References

- 1 Z. He, T. Ishizuka, Y. Hishikawa and Y. Xu, Click Chemistry for Fluorescence Imaging via Combination of a BODIPY-Based 'Turn-on' Probe and a Norbornene Glucosamine, *Chem. Commun.*, 2022, **58**, 12479-12482.
- 2 L. Chen, F. Li, Y. Li, J. Yang, Y. Li and B. He, Red-Emitting Fluorogenic BODIPY-Tetrazine Probes for Biological Imaging, *Chem. Commun.*, 2022, **58**, 298-301.
- 3 D. Wu and D. F. O'Shea, Fluorogenic NIR-Probes Based on 1,2,4,5-Tetrazine Substituted BF<sub>2</sub>-Azadipyrromethenes, *Chem. Commun.*, 2017, **53**, 10804-10807.

- 4 R. Swann, S. Slikboer, A. Genady, L. R. Silva, N. Janzen, A. Faraday, J. F. Valliant and S. Sadeghi, Tetrazine-Derived Near-Infrared Dye for Targeted Photoacoustic Imaging of Bone, *J. Med. Chem.*, 2023, **66**, 6025-6036.
- 5 A. D. Becke, Density-Functional Thermochemistry. III. The Role of Exact Exchange, *J. Chem. Phys.*, 1993, **98**, 5648-5652.
- 6 G. Scalmani, M. J. Frisch, B. Mennucci, J. Tomasi, R. Cammi and V. Barone, Geometries and Properties of Excited States in the Gas Phase and in Solution: Theory and Application of a Time-Dependent Density Functional Theory Polarizable Continuum Model, *J. Chem. Phys.*, 2006, **124**, 94107.
- 7 M. J. Frisch, G. W. Trucks, H. B. Schlegel, G. E. Scuseria, M. A. Robb, J. R. Cheeseman, G. Scalmani, V. Barone, G. A. Petersson, H. Nakatsuji, X. Li, M. Caricato, A. V. Marenich, J. Bloino, B. G. Janesko, R. Gomperts, B. Mennucci, H. P. Hratchian, J. V. Ortiz, A. F. Izmaylov, J. L. Sonnenberg, D. WilliamsYoung, F. Ding, F. Lipparini, F. Egidi, J. Goings, B. Peng, A. Petrone, T. Henderson, D. Ranasinghe, V. G. Zakrzewski, J. Gao, N. Rega, G. Zheng, W. Liang, M. Hada, M. Ehara, K. Toyota, R. Fukuda, J. Hasegawa, M. Ishida, T. Nakajima, Y. Honda, O. Kitao, H. Nakai, T. Vreven, K. Throssell, J. A. Montgomery, Jr., J. E. Peralta, F. Ogliaro, M. J. Bearpark, J. J. Heyd, E. N. Brothers, K. N. Kudin, V. N. Staroverov, T. A. Keith, R. Kobayashi, J. Normand, K. Raghavachari, A. P. Rendell, J. C. Burant, S. S. Iyengar, J. Tomasi, M. Cossi, J. M. Millam, M. Klene, C. Adamo, R. Cammi, J. W. Ochterski, R. L. Martin, K. Morokuma, O. Farkas, J. B. Foresman, and D. J. Fox, Gaussian, Inc., Wallingford CT, 2016.
- 8 A. D. Becke, A New Mixing of Hartree-Fock and Local Density-Functional Theories, *J. Chem. Phys.*, 1993, **98**, 1372-1377.
- 9 G. A. Petersson, A. Bennett, T. G. Tensfeldt, M. A. Al-Laham, W. A. Shirley and J. Mantzaris, A Complete Basis Set Model Chemistry. I. The Total Energies of Closed-Shell Atoms and Hydrides of the First-Row Elements, *J. Chem. Phys.*, 1988, **89**, 2193-2218.
- 10 G. Petersson and M. A. Al-Laham, A Complete Basis Set Model Chemistry. II. Open-Shell Systems and the Total Energies of the First-Row Atoms, *J. Chem. Phys.*, 1991, **94**, 6081-6090.
- 11 A. V. Marenich, C. J. Cramer and D. G. Truhlar, Universal Solvation Model Based on Solute Electron Density and on a Continuum Model of the Solvent Defined by the Bulk Dielectric Constant and Atomic Surface Tensions, *J. Phys. Chem. B*, 2009, **113**, 6378-6396.
- 12 M. Caricato, B. Mennucci, J. Tomasi, F. Ingrosso, R. Cammi, S. Corni and G. Scalmani, Formation and Relaxation of Excited States in Solution: A New Time Dependent Polarizable Continuum Model Based on Time Dependent Density Functional Theory, *J. Chem. Phys.*, 2006, **124**, 124520.
- 13 T. Lu and F. Chen, Multiwfn: A Multifunctional Wavefunction Analyzer, *J. Comput Chem.*, 2012, **33**, 580-592.
- 14 W. Humphrey, A. Dalke and K. Schulten, VMD: Visual Molecular Dynamics, *J. Mol. Graph.*, 1996, **14**, 33-38.
